## CORRESPONDENCE

2. Croce E, Azzola M, Russo R, Golia M, Angelini S, Olmi S: Laparoscopic liver tumour resection with the argon beam. *Endosc Surg Allied Technol* 1994; 2:186-8

3. Mastragelopoulos N, Sarkar MR, Kaissling G, Bahr R, Daub D: Argon gas embolism in laparoscopic cholecystectomy with the Argon Beam One coagulator. *Chirurg* 1992; 63:1053-4

4. Palmer M, Miller CW, Van Way CW, Orton EC: Venous gas embolism associated with argon-enhanced coagulation of the liver. *J Invest Surg* 1993; 6:391-9

(Accepted for publication May 2, 1996.)

Anesthesiology  
1996; 85:444

© 1996 American Society of Anesthesiologists, Inc.  
Lippincott-Raven Publishers

## A Useful Maneuver when Intravenous Access is Difficult

*To the Editor:*—It is not uncommon for intravenous access to be difficult because a patient has severe vasoconstriction or a poor superficial venous system. Sometimes, application of a warm compress over the patient's hand will dilate the veins sufficiently. The following is another technique that may assist in cannulating peripheral veins, without resorting to a central venous route. If a patient arrives in the operating room with a 25G needle in place, use it. If not, try inserting a 22G or a 25G needle anywhere you can find a vein. After ensuring the intravenous line is functioning, apply a venous tourniquet to the

upper arm and infuse 50-100 ml of intravenous solution with a 10 ml syringe. One will be pleasantly surprised to find the patient's veins unexpectedly accessible.

**Koretada Kondo, M.D.**  
Department of Anesthesiology  
St. Vincent's Medical Center  
Bridgeport, Connecticut 06606

(Accepted for publication May 6, 1996.)

Anesthesiology  
1996; 85:444-5

© 1996 American Society of Anesthesiologists, Inc.  
Lippincott-Raven Publishers

## Infectious Complications after Epidural Anesthesia

*To the Editor:*—A recent case report by Pinczower and Gyorke<sup>1</sup> addressed a clinically important but rarely reported subject—an infectious complication of epidural anesthesia and analgesia. Because of clustering and pure chance, prospective studies on epidural anesthesia were not large enough to detect rare events such as epidural abscess or vertebral osteomyelitis.<sup>2</sup> A recent, large, retrospective study that analyzed 288,000 epidural catheterizations suffers from potential misclassification bias and other restrictions linked to retrospective analysis by a questionnaire.<sup>3</sup> In addition, symptoms of infectious complications related to an epidural catheter may present so late that they are not traced back to the previous epidural catheter. Recognizing catheter-related infections such as epidural abscess<sup>4</sup> or vertebral osteomyelitis<sup>1</sup> is important, because they can result in permanent neurologic damage. The need for an increased level of awareness of catheter-related osteomyelitis is stressed by two previous case reports of this complication and by a time delay of 8 and 15 weeks between onset of symptoms and definite diagnosis in these patients.<sup>5,6</sup> The question of whether the epidural catheter only serves as a nidus for hematogenous spread or as a primary entrance port of

infection can rarely be answered in the individual case and has no influence on course and treatment of this complication. However, it is interesting that the patient reported by Pinczower and Gyorke and one of the previously reported patients<sup>6</sup> were both diagnosed with vertebral osteomyelitis secondary to *Pseudomonas aeruginosa*, whereas the most common organism in epidural catheter-related infections is *Staphylococcus aureus*.<sup>7</sup> An important aspect is that all three patients with catheter-related osteomyelitis were immunocompromised. Pinczower and Gyorke's patient received systemic methylprednisolone therapy and, of the previously reported patients, one received triamcinolone and betamethasone epidurally, in addition to suffering from diabetes mellitus,<sup>5</sup> and the other patient was immunocompromised by a history of pancreatitis and high alcohol intake.<sup>6</sup>

It is necessary to increase the index of awareness among physicians for infectious complications of epidural anesthesia and analgesia, and special care should be exercised with epidural catheters in immunocompromised patients.



## CORRESPONDENCE

**Christoph H. Kindler, M.D.**  
Staff Anesthesiologist  
**Manfred D. Seeberger, M.D.**  
Staff Anesthesiologist  
Department of Anesthesia  
University of Basel, Kantonsspital,  
CH-4031 Basel, Switzerland

## References

1. Pinczower GR, Gyorke A: Vertebral osteomyelitis as a cause of back pain after epidural anesthesia. *ANESTHESIOLOGY* 1996; 84:215-7
2. Dahlgren N, Törnebrandt K: Neurological complications after anaesthesia. A follow-up of 18,000 spinal and epidural anaesthetics performed over three years. *Acta Anaesthesiol Scand* 1995; 39:872-80

3. Palot M, Visseaux H, Botmans C, Pire JC: Epidémiologie des complications de l'analgésie péridurale obstétricale. *Cah Anesthesiol* 1994; 42:229-33
4. Borum SE, McLeskey CH, Williamson JB, Harris FS, Knight AB: Epidural abscess after obstetric epidural analgesia. *ANESTHESIOLOGY* 1995; 82:523-6
5. Wenningsted-Torgard K, Heyn J, Willumsen L: Spondylitis following epidural morphine. A case report. *Acta Anaesthesiol Scand* 1982; 26:649-51
6. Lynch J, Zech D: Spondylitis without epidural abscess formation following short-term use of an epidural catheter. *Acta Anaesthesiol Scand* 1990; 34:167-70
7. Pegues DA, Carr DB, Hopkins CC: Infectious complications with temporary epidural catheters. *Clin Infect Dis* 1994; 19:970-2

(Accepted for publication May 8, 1996.)

Anesthesiology  
1996; 85:445  
© 1996 American Society of Anesthesiologists, Inc.  
Lippincott-Raven Publishers

## Color of Compressed Gas Cylinders

*To the Editor:*—Reading the potentially disastrous case of an intraabdominal fire by Greilich *et al.*<sup>1</sup> prompted me to immediately call a major medical gas supplier here in Australia to check whether such a dangerous gas cylinder was available. As in the United States, routinely available Carbogen (5% CO<sub>2</sub> in 95% O<sub>2</sub>) has a different pin index to 100% CO<sub>2</sub>. Other mixtures of CO<sub>2</sub> and O<sub>2</sub> can be supplied on request, but would normally be fitted with a bull-nosed industrial-type valve, unless a medical-type pin-indexed valve was requested. Also as in the United States, if such a medical valve was requested, mixtures with 7% CO<sub>2</sub> or greater would be fitted with pin positions identical those of a 100% CO<sub>2</sub> cylinder. However, the guidelines also specify that the color of the body of the cylinder should be that of the predominant gas (*i.e.*, >50% concentration), and the shoulder of the cylinder should be colored that of the "minor" gas. With these guidelines, 14% CO<sub>2</sub> in 86% oxygen would look more like an oxygen cylinder but would only fit a CO<sub>2</sub> pin-indexed yoke. Although still potentially dangerous, this almost certainly would have been safer than the safety features described in the report (*i.e.*, a small green collar plus a label). One also wonders why such a

mixture with a medical pin index existed in the hospital in the first place.

**Mark Priestley, M.B.B.S., F.A.N.Z.C.A.**  
Staff Specialist  
Department of Anaesthesia  
Westmead Hospital  
Hawkesbury Road  
Westmead 2145 NSW  
Sydney, Australia

## Reference

1. Greilich PE, Greilich NB, Froelich EG: Intraabdominal fire during laparoscopic cholecystectomy. *ANESTHESIOLOGY* 1995; 83:871-4

(Accepted for publication May 14, 1996.)

Anesthesiology  
1996; 85:445-6  
© 1996 American Society of Anesthesiologists, Inc.  
Lippincott-Raven Publishers

*In Reply:*—We are delighted to respond to the letter from our Australian colleague, Priestley, regarding safety features in the packaging of the medical gases. Following the Australian guidelines, our

hazardous mixture of the 86% O<sub>2</sub>/14% CO<sub>2</sub> would have been packaged in a green cylinder with gray striping on the collar rather than the reverse.<sup>1</sup> Theoretically, our error could have been averted by
